# Supplementary material
Source: PubMed Central journal article supplement (PMC7966270)
Supplement: 3934_table.pdf [file 3934_table.pdf]

**On-line Table: Group comparing the results of ts-VMHC maps between patients and healthy controls<sup>a</sup>**

| Region       | Mesial Temporal Structures | Temporal Pole        | Amygdala             | Insula             | Putamen             | Pallidum             |
|--------------|----------------------------|----------------------|----------------------|--------------------|---------------------|----------------------|
| 0 TR         |                            |                      |                      |                    |                     |                      |
| L-mTLE vs HC | L (-30 -15 -18)/-6.40      | L (-45 24 -30)/-5.33 | L (-30 -6 -12)/-3.93 | L (-36 3 -3)/-4.53 | L (-33 -6 -9)/-3.51 | L (-27 -12 -3)/-4.89 |
| R-mTLE vs HC | R (30 -15 -18)/-6.40       | R (45 24 -30)/-5.33  | R (-30 -6 -12)/-3.93 | R (36 3 -3)/-4.53  | R (33 -6 -9)/-3.51  | R (27 -12 -3)/-4.89  |
| L-mTLE vs HC | L (-30 -18 -18)/-6.62      | L (-48 18 -30)/-5.82 | L (-27 -6 -12)/-5.25 | L (-45 -9 9)/-4.88 | L (-33 -6 -6)/-3.85 | L (-24 -9 0)/-3.24   |
| R-mTLE vs HC | R (30 -18 -18)/-6.62       | R (48 18 -30)/-5.82  | R (-27 -6 -12)/-5.25 | R (45 -9 9)/-4.88  | R (33 -6 -6)/-3.85  | R (24 -9 0)/-3.24    |
| 1 TR         |                            |                      |                      |                    |                     |                      |
| L-mTLE vs HC | L (-30 -15 -18)/-7.00      | L (-45 18 -36)/-6.10 | L (-30 -6 -12)/-3.99 | L (-36 6 -6)/-4.45 | L (-33 6 -3)/-4.30  | L (-27 -12 -3)/-4.40 |
| R-mTLE vs HC | R (30 -15 -18)/-6.62       | R (42 21 -36)/-6.18  | R (21 3 -12)/-4.18   | R (39 8 -8)/-3.30  | R (33 6 -3)/-4.37   | R (27 -12 -3)/-4.32  |
| L-mTLE vs HC | L (-30 -15 -18)/-6.23      | L (-48 18 -33)/-5.47 | L (-27 -6 -12)/-4.56 | L (-42 0 3)/-4.08  | L (-27 -6 -6)/-3.23 | L (-18 -3 -3)/-3.57  |
| R-mTLE vs HC | R (30 -18 -18)/-7.64       | R (48 18 -30)/-5.94  | R (24 -3 -15)/-4.99  | R (45 -9 6)/-5.26  | R (24 6 -9)/-4.02   | R (15 3 3)/-4.04     |
| 2 TR         |                            |                      |                      |                    |                     |                      |
| L-mTLE vs HC | L (-30 -12 -18)/-5.32      | L (-42 24 -36)/-4.65 | NS                   | L (-39 3 -9)/-3.40 | L (-30 9 0)/-3.65   | NS                   |
| R-mTLE vs HC | R (30 -18 -18)/-4.79       | R (42 21 -39)/-4.69  | NS                   | NS                 | NS                  | NS                   |
| L-mTLE vs HC | L (-33 -15 -18)/-5.16      | L (-45 21 -36)/-4.41 | NS                   | NS                 | NS                  | NS                   |
| R-mTLE vs HC | R (30 -18 -18)/-6.90       | R (51 18 -27)/-5.10  | R (21 3 -12)/-4.47   | R (39 18 -9)/-4.21 | NS                  | NS                   |
| 3 TR         |                            |                      |                      |                    |                     |                      |
| L-mTLE vs HC | L (-36 -9 -21)/-3.94       | NS                   | NS                   | NS                 | NS                  | NS                   |
| R-mTLE vs HC | NS                         | NS                   | NS                   | NS                 | NS                  | NS                   |
| L-mTLE vs HC | NS                         | NS                   | NS                   | NS                 | NS                  | NS                   |
| R-mTLE vs HC | R (33 -21 -21)/-2.67       | NS                   | NS                   | NS                 | NS                  | NS                   |

**Note:** —NS indicates no significant difference; L, left hemisphere; R, right hemisphere; MNI, Montreal Neurological Institute; L, left; R, right.

<sup>a</sup> All peak-points coordinates are MNI coordinate system; MNI coordinates are presented in millimeters.
